# Supplementary material
Source: Springer Nature journal article supplement (https://www.springermedizin.de/resource/supplementary/12958_2005_288_MOESM4_ESM.pdf/9567664)

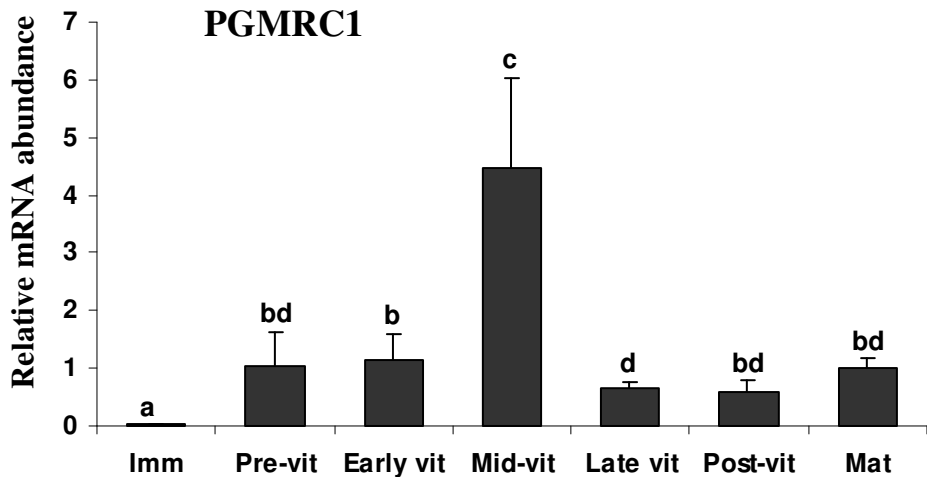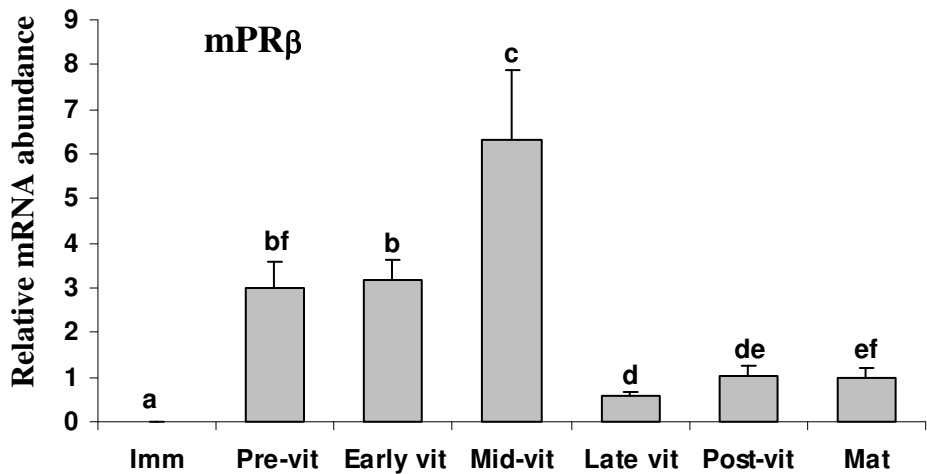

Supplement: MOESM4 [file 9567664]
